# Supplementary material for: Cluster randomised trial of a health system strengthening approach applying person-centred communication for the prevention of female genital mutilation in Guinea, Kenya and Somalia
Source: HighWire-hosted journal article supplement (doi:10.1136/bmjopen-2023-078771), 2024-07-01

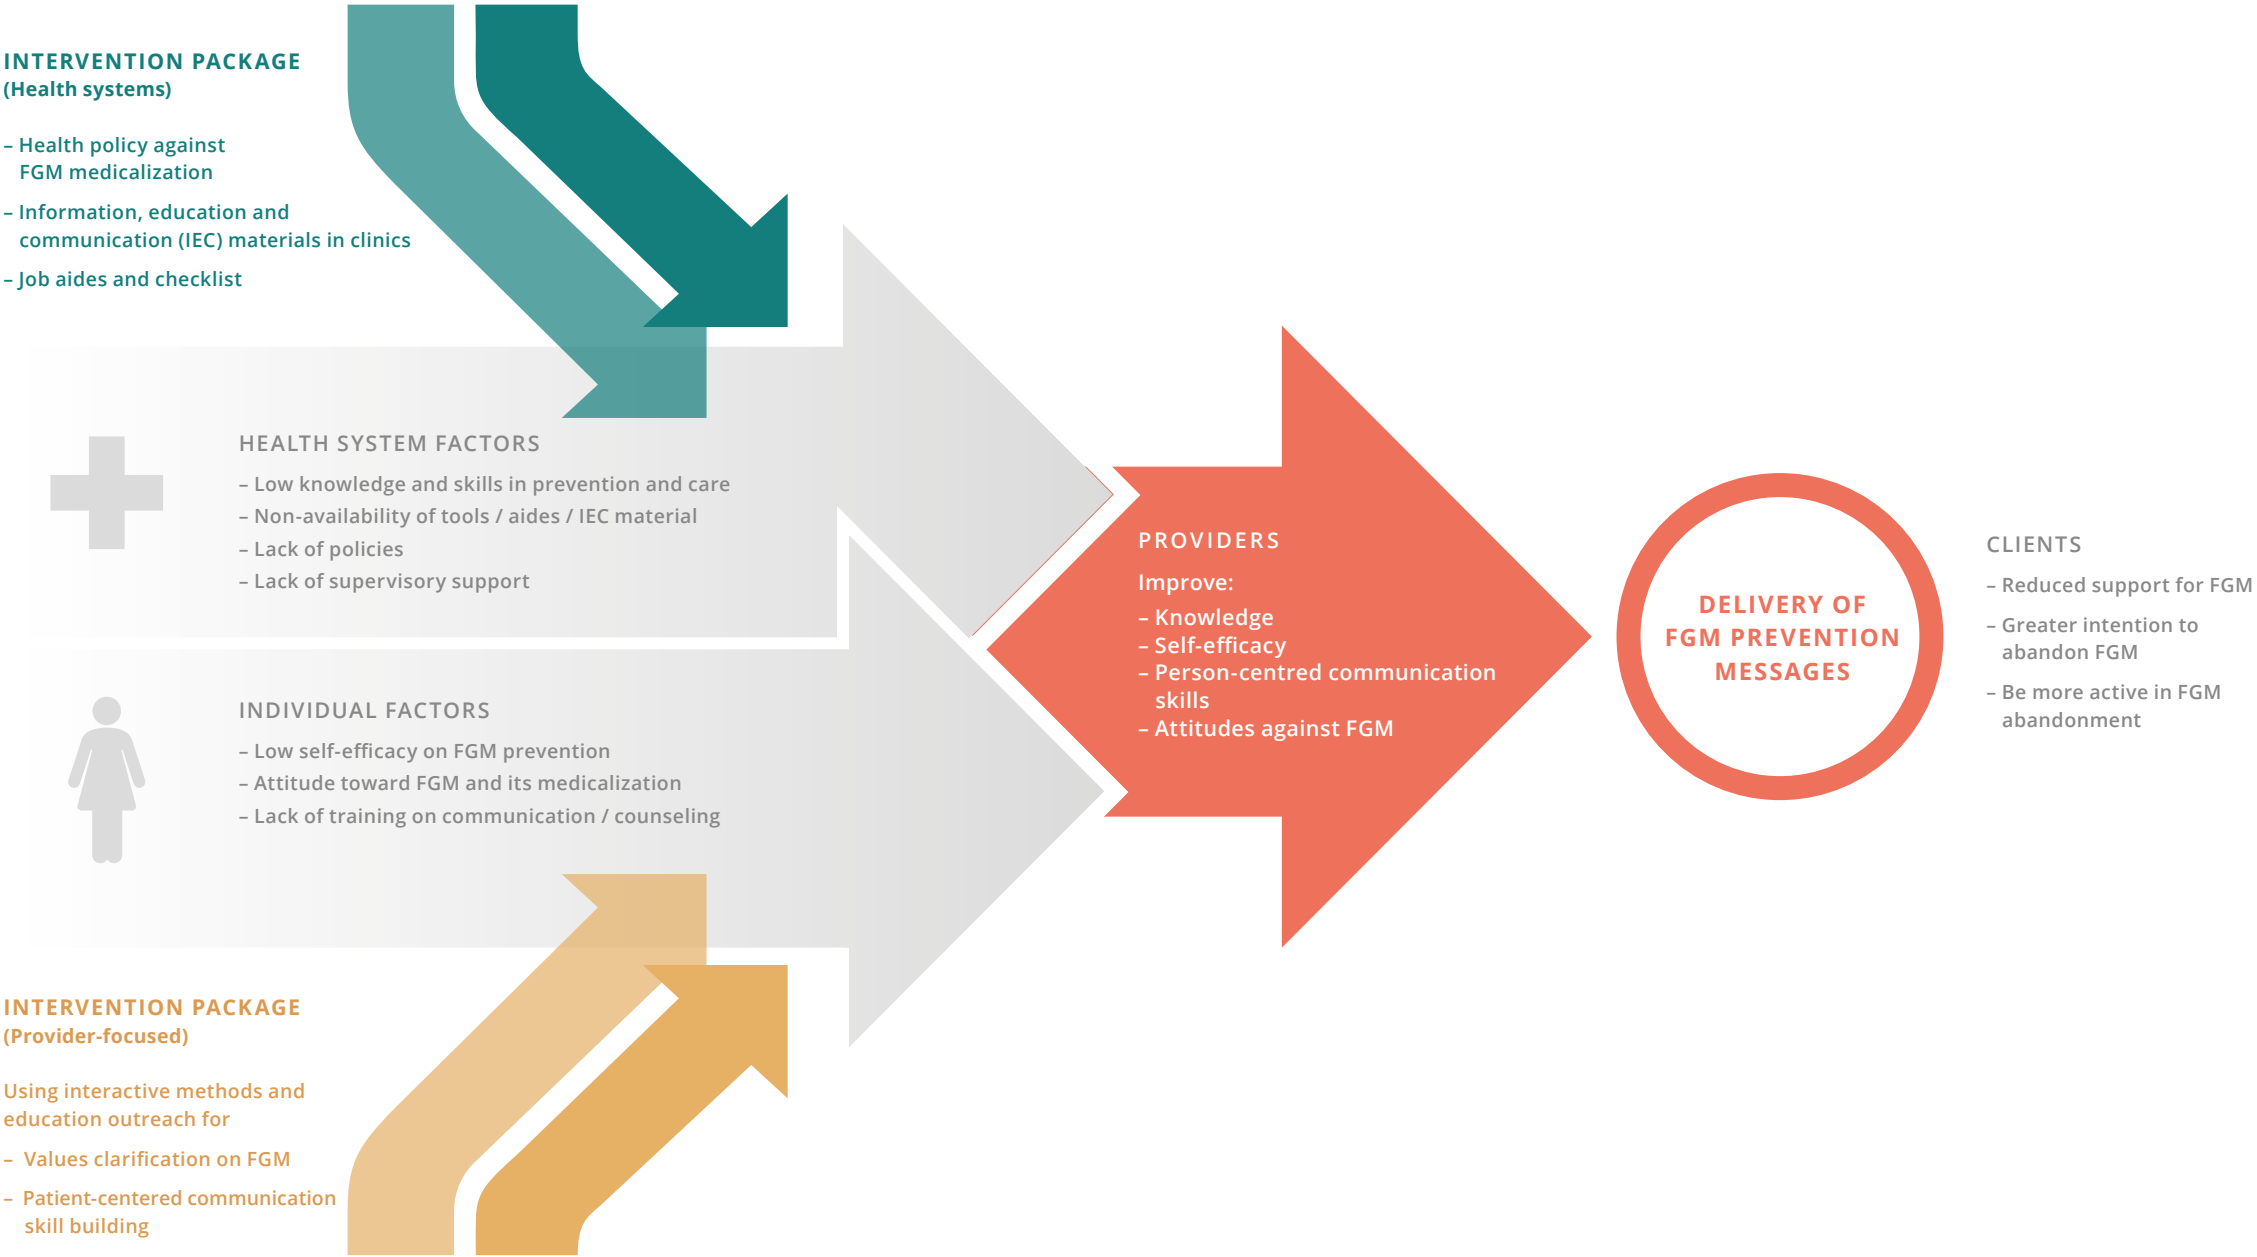

Supplement: bmjopen-2023-078771supp001_data_supplement.pdf [file bmjopen-2023-078771supp001_data_supplement.pdf]
