# Supplementary material for: Cluster randomised trial of a health system strengthening approach applying person-centred communication for the prevention of female genital mutilation in Guinea, Kenya and Somalia
Source: HighWire-hosted journal article supplement (doi:10.1136/bmjopen-2023-078771), 2024-07-01
Supplement: bmjopen-2023-078771supp002_data_supplement.pdf [file bmjopen-2023-078771supp002_data_supplement.pdf]

## Supplementary file 2 : Measurement of study outcomes

### 1. **Primary Outcome:** Health facility preparedness to provide FGM prevention and care services.

**Outcome definition:** Cumulative score based on affirmative responses to Q9a, Q10a, Q11a & Q12a on the CHK form (see below).

Q9. Is there an MoH policy on FGM posted on the wall?

Yes

No

Q9a. If yes, is it placed where health care providers can see/read it e.g., bulletin board?

Yes

No

Q10. Are there WHO FGM prevention posters on the wall of the consultation room and/or waiting room?

Yes

No

Q10a. If yes, are they placed in a place where ANC clients can see them?

Yes

No

Q11. Is there a WHO clinical handbook in the ANC consultation room?

Yes

No

Q11a. If yes, is it placed where ANC providers can see/use it?

Yes

No

Q12. Is there an FGM ABCD guide in the ANC consultation room?

Yes

No

Q12a. If yes, is it placed where ANC providers can see/use it?

Yes

No

### 2. **Primary outcome:** ANC provider utilization of Level 1 package components

**Outcome definition:** Affirmative response on Q40 of HCP form (see below).

Q40. Have you referred to the WHO Clinical Handbook on FGM?

Yes

No, available but not referred

No, not available

Don't know

### 3. **Primary outcome:** Provision of FGM-related care after PCC training

**Outcome definition:** Cumulative score based on affirmative responses (Provision of FGM-related care (after PCC training) either 'Always' or 'Often') on Q22, Q24 & Q25 on the HCP form (see below).

Q22. How often do you discourage a pregnant woman expecting to have a girl, or one having a girl at the age of cutting, from having her daughter cut?

Always

Often

Sometimes

Rarely

Never  
Rarely  
Refused to answer

Q24. How often do you look for female genital mutilation when performing a gynecological examination of the vulva?

Always  
Often  
Sometimes  
Rarely  
Never  
Rarely  
Refused to answer

Q25. How often do you record female genital mutilation in the woman's medical file if you are aware that she has undergone FGM?

Always  
Often  
Sometimes  
Rarely  
Never  
Rarely  
Refused to answer

#### **4. Primary Outcome: Delivery of PCC 'ABCD' package**

**Outcome definition:** Cumulative score based on affirmative responses on Q5, Q7, Q8, Q9 & Q12 on the EXT form.

Q5. Did the ANC provider ask if you have undergone FGM?

Yes  
No  
Don't know  
Refused

Q7. Did the ANC provider ask about your personal belief regarding FGM?

Yes  
No  
Don't know  
Refused

Q8. Did the ANC provider discuss why FGM should be prevented?

Yes  
No  
Don't know  
Refused

Q9. Did the ANC provider discuss how FGM could be prevented?

Yes  
No  
Don't know  
Refused

Q12. Are you satisfied with how FGM was addressed during your visit with your ANC provider today?

Yes  
No  
Don't know  
Refused

### 5. Secondary Outcome: Improved knowledge about FGM

**Outcome definition:** Cumulative score based on correct responses to Q4 + affirmative responses to Q5 & Q7 of the HCP form.

Q4. Please provide the WHO classification for the following images

Type I

Type II

Type III

Type IV

Don't Know

Other

Q5. Do you know of any health complications arising from female genital mutilation?

Yes

No

Q7. Are you aware of any existing WHO tools/guidance on FGM prevention and care?

Yes

No

### 6. Secondary Outcome: Improved interpersonal communication skills

**Outcome definition:** Cumulative score based on positive responses ('Always or Often') to Q34, Q35, Q36, Q37, Q38 on the HCP form.

Now I will ask you about your communication skills

34. I can put myself in others shoes

Always

Often

Sometimes

Rarely

Never

Rarely

Refused to answer

35. I let others know that I understand what they say

Always

Often

Sometimes

Rarely

Never

Rarely

Refused to answer

36. In conversations with my colleagues, I perceive not only what they say but what they don't say

Always

Often

Sometimes

Rarely

Never

Rarely

Refused to answer

37. I communicate effectively

Always

Often

Sometimes

Rarely

Never

Rarely

Refused to answer

38. I communicate with others as though they are my equals

Always

Often

Sometimes

Rarely

Never

Rarely

Refused to answer

### 7. Secondary outcome: Improved self-efficacy

**Outcome definition:** Cumulative score based on positive responses (Agree or Strongly Agree) to Q26, Q27, Q28, Q29, Q30, Q31, Q32, Q33 on the HCP form.

Now I would like to ask you a few questions about how you solve problems that you face.

Please tell me how much you agree or disagree with the statements that I read to you

1 = Strongly disagree

2 = Disagree

3 = Neither agree nor disagree

4 = Agree

5 = Strongly agree

Q26. I will be able to achieve most of the goals that I have set for myself

Q27. When facing difficult tasks, I am certain that I will accomplish them

Q28. In general, I think that I can obtain outcomes that are important to me

Q29. I believe that I can succeed at almost any endeavor to which I set my mind

Q30. I will be able to successfully overcome many challenges

Q31. I am confident that I can perform effectively on many different tasks

Q32. Compared to other people, I can do most tasks very well

Q33. Even when things are tough, I can perform quite well

### 8. Secondary outcome: Improved attitudes towards FGM

**Outcome definition:** Cumulative score based on positive responses to Q12, Q13, Q14, Q15, Q16, Q17, Q18 & Q19 on the HCP form.

For each of the following statements please state if you:

1=Agree

2=Disagree

3=Don't know

4=Refused to answer

Q12. A girl who has not undergone FGM is unclean

Q13. A girl who has not undergone FGM cannot be married within her community

Q14. A girl who has not undergone FGM is a disgrace to her family's honor

Q15. Health care providers who provide FGM are violating FGM

Q16. Health care providers who provide FGM should be punished

Q17. FGM is a good practice

Q18. FGM is a violation of women and girls' rights

Q19. FGM is religious mandate

**9. Tertiary outcome: ANC provider confidence in FGM knowledge to provide care**

**Outcome definition:** Positive responses ('Somewhat Confident' or 'Confident') to Q8 & Q9 on the HCP form

Q8. When you treat or attend to a girl or woman with female genital mutilation, how confident are you that you have enough knowledge to provide good quality care?

- 1=Not confident
- 2=Somewhat confident
- 3=Confident
- 4=Refused to answer

Q9. How confident are you in your knowledge to communicate on FGM prevention?

- 1=Not confident
- 2=Somewhat confident
- 3=Confident
- 4=Refused to answer

**10. Tertiary outcome: ANC provider support for FGM**

**Outcome definition:** Positive response ('Do not intend to cut her') to Q20 on the HCP form

Q20. Pretend you had a daughter now who was at an age when cutting occurs, what would your intention to cut her be?

- 1=Intend to cut her
- 2=Do not intend to cut her
- 3=Don't know
- 4=Refused to answer

**11. Tertiary outcome: ANC provider support for medicalized FGM**

**Outcome definition:** Correct response ('No') to Q21 on HCP form

Q21. If a family brought their daughter to the clinic requesting genital cutting, for non-health reasons, would you perform it?

- 1=Yes
- 2=No
- 3=Don't know
- 4=Refused to answer

**12. Tertiary outcome: ANC client change in support for FGM after ANC visit**

**Outcome definition:** Response to Q13 on EXT form

Q13. What do you feel about FGM now as compared to before you came to the clinic today?

- 1= Same, no change
- 2=I feel more supportive of FGM now as compared to before I came
- 3=I feel less supportive of FGM now as compared to before I came
- 4=Don't know
- 5=Other
- 6=Refused to answer

**13. Tertiary outcome: ANC client support or opposition to FGM**

**Outcome definition:** Response to Q14 on EXT form

Q14. How supportive are you of female genital mutilation?

- 1=Strongly opposed
- 2=Somewhat opposed

- 3=Neutral
- 4=Somewhat supportive
- 5=Strongly supportive
- 6=Refused to answer

**14. Tertiary outcome: ANC client intention to cut after ANC visit.**

**Outcome definition:** Response to Q16 on EXT form

Q.16 Pretend you had a daughter now who was at an age where cutting occurs, what would your intention to cut her be?

- 1=Intend to cut her
- 2=Do not intend to cut her
- 3=Don't know
- 4=Refused to answer

**15. Tertiary outcome: ANC client choice of who to cut their daughters.**

**Outcome definition:** Response to Q17 on EXT form

Q17. If intending to cut, who would you prefer to do the cutting?

- 1=Traditional practitioner
- 2=Health care provider
- 3=Other
- 4=Refused to answer

**16. Tertiary outcome: ANC client wish to be active in FGM prevention**

**Outcome definition:** Response to Q18 on EXT form

Q.18 Do you wish/want to be active in preventing FGM?

- 1=Yes
- 2=No
- 3=Don't know
- 4=Refused to answer
