# Supplementary material for: Cluster randomised trial of a health system strengthening approach applying person-centred communication for the prevention of female genital mutilation in Guinea, Kenya and Somalia
Source: HighWire-hosted journal article supplement (doi:10.1136/bmjopen-2023-078771), 2024-07-01
Supplement: bmjopen-2023-078771supp004_data_supplement.pdf [file bmjopen-2023-078771supp004_data_supplement.pdf]

Supplementary file 3: Additional analyses (appendices 1 – 3)

Appendix 1: Comparison baseline characteristics of ANC facilities

| Characteristics                                       | Facilities included in final analysis<br>(n=163)                      | Facilities excluded* from final analysis<br>(n=17)             |
|-------------------------------------------------------|-----------------------------------------------------------------------|----------------------------------------------------------------|
| Number of ANC providers                               | Mean 4 (SD: 3) Median 3 (1-14, IQR 3)                                 | Mean 3 (SD: 3) Median 2 (1-9, IQR 1)                           |
| Average number of ANC clients/month                   | Mean 150 (SD: 127) Median 118 (3-664, IQR 141)                        | Mean 162 (SD: 147) Median 100 (25-600, IQR 200)                |
| MoH supervisory visits in the past year               | Mean 4 (SD: 3) Median 3 (0-18, IQR 2)                                 | Mean 5 (SD: 4) Median 4 (0-12, IQR 4)                          |
| Size of catchment population served                   | Mean 36,754 (SD: 126,082) Median 15,972 (1,000-1,458,000, IQR 24,332) | Mean 11,737 (SD: 14,62) Median 7,800 (1,200-63,000, IQR 7,505) |
| Presence of anti-FGM activities in the catchment area |                                                                       |                                                                |
| Yes                                                   | 74 (45%)                                                              | 9 (53%)                                                        |
| No                                                    | 89 (55%)                                                              | 8 (47%)                                                        |
| Presence of pro-FGM activities in the catchment area  |                                                                       |                                                                |
| Yes                                                   | 21 (13%)                                                              | 2 (12%)                                                        |
| No                                                    | 140 (86%)                                                             | 15 (88%)                                                       |
| Don't Know                                            | 2 (1%)                                                                | -                                                              |

\*Total of ANC clinics not included: 16 clinics were excluded (7 intervention and 9 control) due to loss-to-follow up (LTFU) of ANC provider i.e., the clinics did not have at least one ANC provider present across all study time points while one ANC clinic in Kenya was never visited at subsequent time points due to issues with insecurity. An ANC provider from one of the clinics in Kenya that had been inaccessible due to insecurity attended the PCC training and was subsequently interviewed.

## Appendix 2: Comparison of baseline characteristics of ANC providers

| Characteristics                                          | Providers recruited at Baseline<br>(n=436) | Providers enrolled with complete data<br>at Month 6<br>(n=232) | Providers not enrolled with no data at<br>Month 6<br>(n=204) |
|----------------------------------------------------------|--------------------------------------------|----------------------------------------------------------------|--------------------------------------------------------------|
| Age                                                      | 37 (20-65; SD: 10)                         | 36 (20-65; SD: 10)                                             | 38 (21-62; SD: 10)                                           |
| Years of professional experience                         | 9 (1-39; SD: 7)                            | 8 (1-39; SD: 7)                                                | 10 (1-36; SD: 8)                                             |
| Sex                                                      |                                            |                                                                |                                                              |
| Female                                                   | 361 (83%)                                  | 193 (83%)                                                      | 168 (82%)                                                    |
| Male                                                     | 75 (17%)                                   | 39 (17%)                                                       | 36 (18%)                                                     |
| Highest educational level                                |                                            |                                                                |                                                              |
| Certificate                                              | 44 (3%)                                    | 21 (5%)                                                        | 23 (11%)                                                     |
| Diploma                                                  | 309 (71%)                                  | 158 (68%)                                                      | 151 (74%)                                                    |
| Bachelors                                                | 64 (15%)                                   | 44 (19%)                                                       | 20 (10%)                                                     |
| Masters & above                                          | 3 (0.7%)                                   | 1 (0.4%)                                                       | 2 (1%)                                                       |
| Other <sup>#</sup>                                       | 16 (4%)                                    | 8 (3%)                                                         | 8 (4%)                                                       |
| Current professional role/title                          |                                            |                                                                |                                                              |
| Midwife                                                  | 198 (45%)                                  | 103 (44%)                                                      | 95 (47%)                                                     |
| Nurse                                                    | 95 (22%)                                   | 51 (22%)                                                       | 44 (22%)                                                     |
| Nurse-Midwife                                            | 94 (22%)                                   | 54 (23%)                                                       | 40 (20%)                                                     |
| Other                                                    | 49 (11%)                                   | 24 (10%)                                                       | 25 (12%)                                                     |
| Received formal training on FGM during clinical training |                                            |                                                                |                                                              |
| Yes                                                      | 158 (36%)                                  | 85 (37%)                                                       | 73 (36%)                                                     |
| No                                                       | 275 (63%)                                  | 146 (63%)                                                      | 129 (63%)                                                    |
| Don't Know                                               | 3 (0.7%)                                   | 1 (0.4%)                                                       | 2 (1%)                                                       |
| Timing of clinical training on FGM                       |                                            |                                                                |                                                              |
| Pre-service                                              | 63 (14%)                                   | 33 (14%)                                                       | 30 (15%)                                                     |
| In-service                                               | 81 (19%)                                   | 45 (19%)                                                       | 36 (18%)                                                     |
| Both pre- and in-service                                 | 14 (3%)                                    | 7 (3%)                                                         | 7 (3%)                                                       |
| Received formal training on communication/counselling    |                                            |                                                                |                                                              |
| Yes                                                      | 287 (66%)                                  | 149 (64%)                                                      | 138 (68%)                                                    |
| No                                                       | 149 (34%)                                  | 83 (36%)                                                       | 66 (32%)                                                     |
| Received formal training on person-centered care         |                                            |                                                                |                                                              |
| Yes                                                      | 227 (52%)                                  | 118 (51%)                                                      | 109 (53%)                                                    |
| No                                                       | 207 (47%)                                  | 131 (56%)                                                      | 94 (46%)                                                     |
| Don't know                                               | 2 (0.5%)                                   | 1 (0.4%)                                                       | 1 (0.5%)                                                     |

| Characteristics                   | Providers recruited at Baseline<br>(n=436) | Providers enrolled with complete data<br>at Month 6<br>(n=232) | Providers not enrolled with no data at<br>Month 6<br>(n=204) |
|-----------------------------------|--------------------------------------------|----------------------------------------------------------------|--------------------------------------------------------------|
| <u>Undergone</u> FGM              |                                            |                                                                |                                                              |
| Yes                               | 226 (52%)                                  | 126 (54%)                                                      | 100 (49%)                                                    |
| No                                | 128 (29%)                                  | 63 (27%)                                                       | 65 (32%)                                                     |
| Don't know                        | 4 (0.9%)                                   | 2 (1%)                                                         | 1 (0.5%)                                                     |
| Refused to answer                 | 3 (0.7%)                                   | 2 (1%)                                                         | 1 (0.5%)                                                     |
| <u>Conducted</u> FGM              |                                            |                                                                |                                                              |
| Yes                               | 35 (8%)                                    | 15 (7%)                                                        | 20 (10%)                                                     |
| Conducted FGM on a girl <18 years |                                            |                                                                |                                                              |
| Yes                               | 32 (7%)                                    | 14 (6%)                                                        | 18 (9%)                                                      |

Appendix 3: Comparison of study outcomes between baseline vs. month 3 and month 3 vs. month 6 in the intervention arm

|                                                                                            | Baseline<br>(Intervention only) | Month 3<br>(Intervention only) | P-value | Month 3<br>(Intervention only) | Month 6<br>(Intervention only) | P-value |
|--------------------------------------------------------------------------------------------|---------------------------------|--------------------------------|---------|--------------------------------|--------------------------------|---------|
| Primary Outcomes                                                                           |                                 |                                |         |                                |                                |         |
| ANC clients reporting that their provider implemented components of PCC for FGM prevention |                                 |                                |         |                                |                                |         |
| Provider asked client if they have undergone FGM                                           | 48 (6%)                         | 298 (37%)                      | <0.0001 | 298 (37%)                      | 694 (78%)                      | <0.0001 |
| Provider asked client about their (client's) personal beliefs regarding FGM                | 38 (5%)                         | 239 (29%)                      | <0.0001 | 239 (29%)                      | 616 (76%)                      | <0.0001 |
| Provider discussed with client why FGM should be prevented                                 | 56 (7%)                         | 243 (30%)                      | <0.0001 | 243 (30%)                      | 629 (77%)                      | <0.0001 |
| Provider discussed with client how FGM could be prevented                                  | 48 (6%)                         | 224 (28%)                      | <0.0001 | 224 (28%)                      | 592 (73%)                      | <0.0001 |
| Client satisfied with how FGM was addressed by provider during clinic visit                | 176 (21%)                       | 346 (43%)                      | <0.0001 | 346 (43%)                      | 684 (84%)                      | <0.0001 |
| Mean score of PCC approach (out of 5)                                                      | 0.5 (0.4-0.5)                   | 1.7 (1.5-1.8)                  | <0.0001 | 1.7 (1.5-1.8)                  | 3.9 (3.8-4.0)                  | <0.0001 |
| Mean score of PCC + appropriate FGM prevention & care (out of 8)                           | 1.8 (1.6-2.1)                   | 3.3 (2.8-3.8)                  | <0.0001 | 3.3 (2.8-3.8)                  | 6.2 (5.9 – 6.6)                | <0.0001 |
| ANC clinic preparedness to offer FGM prevention and care services                          |                                 |                                |         |                                |                                |         |
| Clinics with ALL correct answers for facility preparedness                                 | 0 (0%)                          | 42 (52%)                       | <0.0001 | 42 (52%)                       | 56 (69%)                       | <0.01   |
| Mean score of clinic preparedness (out of 4)                                               | 0.1 (0.01-0.2)                  | 3.1 (2.9-3.4)                  | <0.0001 | 3.1 (2.9-3.4)                  | 3.4 (3.2-3.6)                  | 0.18    |
| Providers using level 1 intervention package                                               | 1 (1%)                          | 61 (58%)                       | <0.0001 | 61 (58%)                       | 96 (91%)                       | <0.0001 |
| Providers offering appropriate FGM-related prevention and care services                    | 11 (11%)                        | 20 (19%)                       | <0.0001 | 20 (19%)                       | 52 (50%)                       | <0.0001 |
| Secondary Outcomes                                                                         |                                 |                                |         |                                |                                |         |
| Providers with correct FGM-related knowledge responses                                     | 0 (0%)                          | 1 (3%)                         | 0.47    | 1 (3%)                         | 8 (8%)                         | 0.06    |
| Providers with appropriate interpersonal communication skills                              | 49 (49%)                        | 62 (59%)                       | 0.08    | 62 (59%)                       | 74 (70%)                       | 0.11    |
| Providers with high self-efficacy                                                          | 85 (85%)                        | 94 (90%)                       | 0.18    | 94 (90%)                       | 86 (82%)                       | 0.17    |
| Providers reporting less supportive attitudes towards FGM                                  | 67 (67%)                        | 75 (71%)                       | 0.26    | 75 (71%)                       | 76 (72%)                       | 0.50    |
| Providers with high confidence scores                                                      | 84 (83%)                        | 81 (77%)                       | 0.30    | 81 (77%)                       | 103 (98%)                      | <0.001  |
| Providers not supportive of FGM                                                            | 91 (91%)                        | 101 (96%)                      | 0.16    | 101 (96%)                      | 100 (96%)                      | 1.0     |
| Providers not supportive of medicalized FGM                                                | 98 (97%)                        | 104 (99%)                      | 0.36    | 104 (99%)                      | 104 (99%)                      | 0.75    |
| Other ANC Client Outcomes                                                                  |                                 |                                |         |                                |                                |         |
| Clients reporting less support for FGM after ANC clinic visit                              | 194 (24%)                       | 235 (29%)                      | 0.01    | 235 (29%)                      | 424 (52%)                      | <0.0001 |
| Clients reporting that they were strongly opposed to FGM                                   | 367 (45%)                       | 345 (43%)                      | 0.38    | 345 (43%)                      | 498 (61%)                      | <0.0001 |
| Clients reporting that they intend to have their daughters cut                             | 249 (30%)                       | 184 (23%)                      | <0.0001 | 184 (23%)                      | 96 (12%)                       | <0.0001 |
| Clients reporting that they would prefer health care provider to cut daughters             | 141 (17%)                       | 117 (14%)                      | 0.003   | 117 (14%)                      | 53 (7%)                        | <0.001  |
| Clients wishing to be active in FGM prevention                                             | 530 (65%)                       | 547 (68%)                      | 0.22    | 547 (68%)                      | 677 (83%)                      | <0.001  |
